# Supplementary material for: Iron–nitrogen-doped mesoporous tungsten carbide nanostructures as oxygen reduction electrocatalysts
Source: Royal Society of Chemistry journal article supplement (doi:10.1039/c4cp01157k), 2014-01-01
Supplement: c4cp01157k1.pdf [file c4cp01157k1.pdf]

## Supporting Information

### **Iron-nitrogen-doped mesoporous tungsten carbide nanostructures as an oxygen reduction electrocatalyst**

Je-Suk Moon,<sup>a</sup> Young-Woo Lee,<sup>a</sup> Sang-Beom Han,<sup>a</sup> Da-Hee Kwak,<sup>a</sup> Kyung-Hoon Lee,<sup>a</sup> Ah-Reum Park,<sup>a</sup> Jung Inn Sohn,<sup>b</sup> SeungNam Cha<sup>b</sup> and Kyung-Won Park\*<sup>a</sup>

<sup>a</sup>Department of Chemical Engineering, Soongsil University, Seoul 156743, Republic of Korea.

<sup>b</sup>Department of Engineering Science, University of Oxford, Oxford OX1 3PJ, UK.

\* Corresponding author.

E-mail address: kwpark@ssu.ac.kr (Prof. K.-W. Park).

Tel: +82-2-820-0613. Fax: +82-2-812-5378.

Fig. S1 J.-S. Moon *et al.*

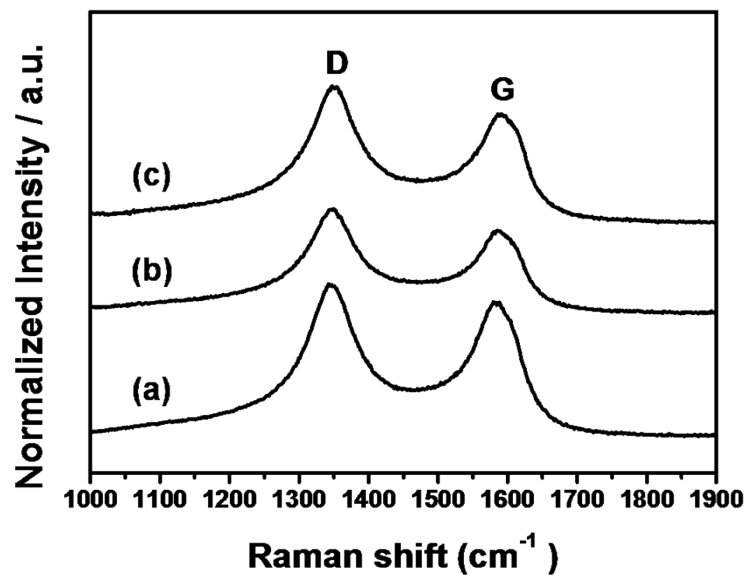

Fig. S1 Raman spectra of (a) WC-m, (b) WC-m-T, and (c) WC-m-FT.

**Fig. S2** J.-S. Moon *et al.*

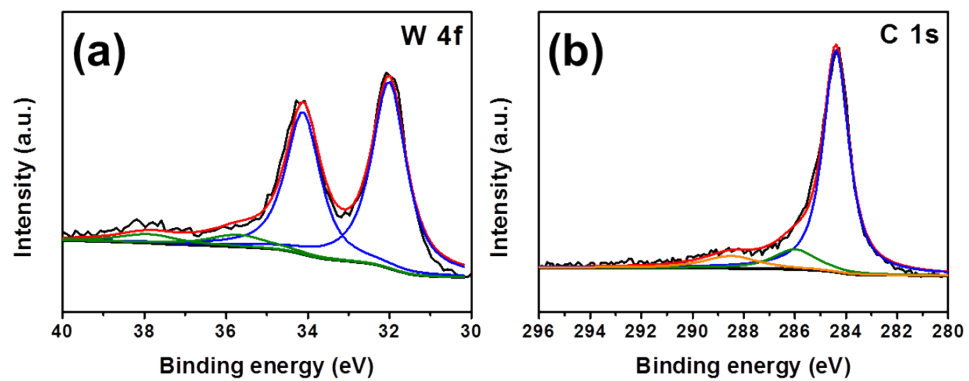

**Fig. S2** XPS spectra of WC-m : (a) W4f, and (b) C1s.

Fig. S3 J.-S. Moon *et al.*

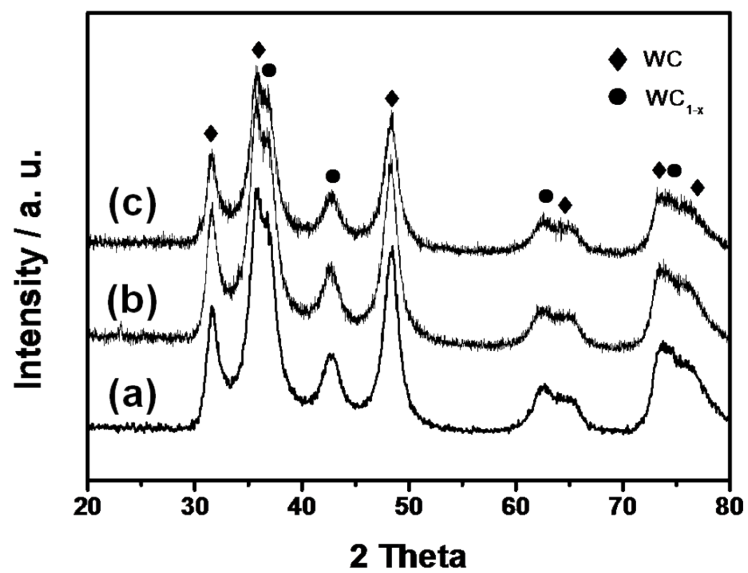

Fig. S3 XRD patterns of (a) WC-m, (b) WC-m-T, and (c) WC-m-FT.

Fig. S4 J.-S. Moon *et al.*

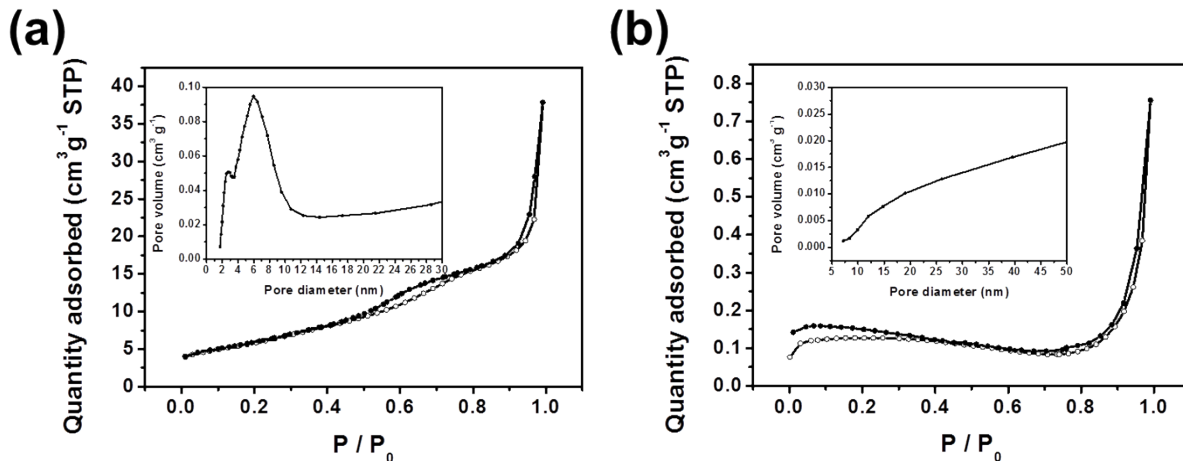

Fig. S4 Characteristic curves of nitrogen gas adsorption–desorption isotherms of (a) WC-m and (b) WC-n. The insets show pore size distributions.

Fig. S5 J.-S. Moon *et al.*

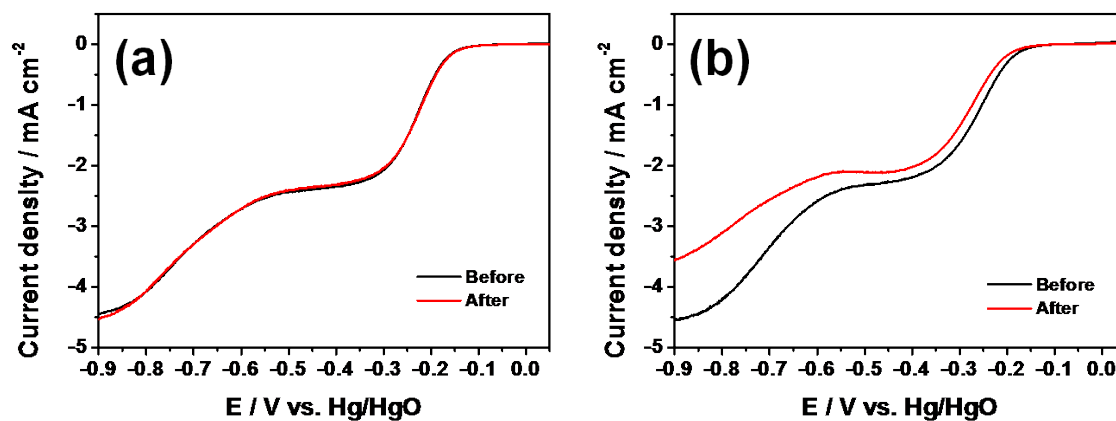

Fig. S5 (a) Polarization curves for (a) WC-m and (b) WC-n before and after stability with a scan rate of 5 mV s<sup>-1</sup> and an electrode rotation rate of 1600 rpm in O<sub>2</sub>-saturated 0.1 M NaOH at 25 °C.

**Fig. S6** J.-S. Moon *et al.*

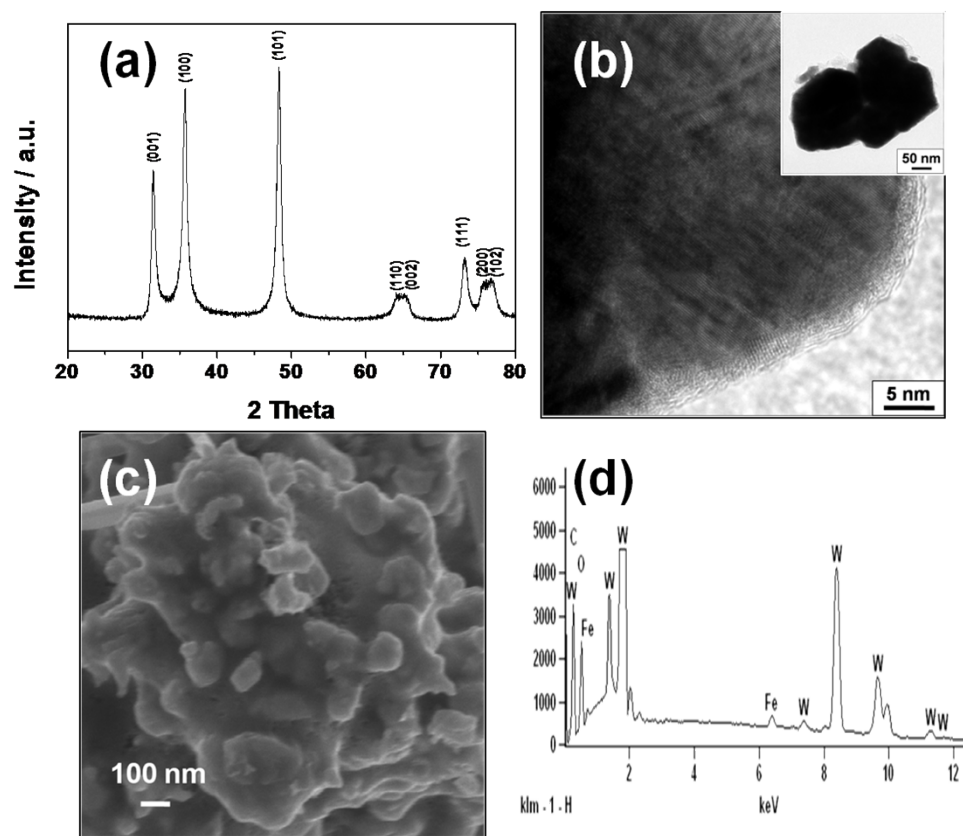

**Fig. S6** (a) XRD pattern, (b) FE-TEM images, (c) FE-SEM image and (d) EDX spectrum of WC-n-FT.

Fig. S7 J.-S. Moon *et al.*

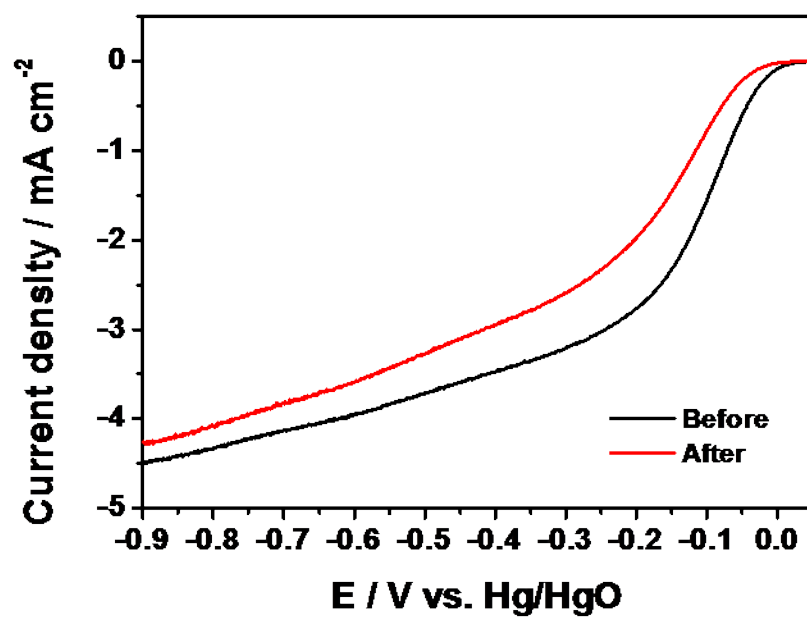

Fig. S7 Polarization curves for WC-n-FT before and after stability with a scan rate of 5 mV s<sup>-1</sup> and an electrode rotation rate of 1600 rpm in O<sub>2</sub>-saturated 0.1 M NaOH at 25 °C.
